# Supplementary material for: Just-in-time Adaptive Intervention for Stabilising Sleep Hours of Japanese Office Workers: A Micro-randomised Trial
Source: Research Square preprint supplement (doi:10.21203/rs.3.rs-2699777/v1), 2023-03-28
Supplement: Supplementary file 1 [file 60fb7c80d2f6e16f8d01e259.xlsx]

## Sheet: Supplementary Data 1
			Mean / n	SD / %
	Demographic data
		Age	39.15	10.09
		Male; n (%)	111	79.29
		BMI	22.83	3.38
		Outpatient; n (%)	35	25
		Full-time employee; n (%)	136	97.14
	Occupation
		Managerial	12	8.57143
		Technical	61	43.5714
		Sales	39	27.8571
		Service	1	0.714286
		Transportation	19	13.5714
		Others	8	5.71429
	BDI-Ⅱ (0~63)
		Score	9.5	7.97
		BDI-Ⅱ>13; n (%)	28	20
	STAI (20~80, respectively)
		State anxiety (STAI Y-1)	39.89	10.35
		Trait anxiety (STAI Y-2)	43.48	11.02
	PANAS (8~48, respectively)
		Positive affect	26.99	6.21
		Negative affect	23.11	7.2
	MEQ (16~86)
		Score	54.79	7.65
		Morning tyep; n (%)	45	32.14
		Intermidiate type; n (%)	90	64.29
		Evening type; n (%)	5	3.57
	MCTQ
		midpoint of sleep on workday	03:09:00	53min
		midpoint of sleep on weekday	03:59:00	19min
		MSFsc	03:39:00	14min
		Absolute social jetlag	53min	46min
	Sleep statistics recorded wearable device
		Bedtime, HH:mm	23:33:00	2h 2min
		Wake-up time, HH:mm	06:55:00	2h 1min
		Midpoint of sleep, HH:mm	03:14:00	1h 45min
		Sleep duration, hour	7h 20min	1h 45min
		Sleep efficiency, %	94.08	6.36

## Sheet: Supplementary Data 2
			Group A (n = 73)		Group B (n = 67)		t-value	p-value	Hedges' g
			Mean	SD	Mean	SD
	Intra-individual statistics
		IIM(SD)	7h 21min	43min	7h 18min	1h 12min	0.28679	0.7748	0.0495301
		IIM(MID)	03:04:00	53min	03:31:00	1h 8min	-2.5801	0.01105	-0.441418
		IIM(SE)	96.1394	1.88611	91.7255	4.01618	8.2038	<0.01	1.42678
		IIV(SD)	0.978478	0.359659	1.84229	0.77068	-8.67	<0.01	-1.47062
		IIV(MID)	0.699404	0.436786	1.7447	1.40914	-7.0509	<0.01	-1.21232
		IIV(SE)	2.41447	1.14243	6.55225	3.60147	-11.039	<0.01	-1.86184
	Exogenous variables
		MEQ	57.0548	6.76365	52.2985	7.84126	3.8273	<0.01	0.651644
		MSFsc	03:18:00	55min	04:04:00	1h 27min	-3.5836	<0.01	-0.651074
		absSJ	42min	30min	1h 5min	57min	-2.9502	<0.01	-0.511574

## Sheet: Supplementary Data 3
		Depressive mood			Anxiety			Subjective sleep quality
		estimate	S.E.	p-value	estimate	S.E.	p-value	estimate	S.E.	p-value
	Intercept	37.9017	1.9435	<0.01	22.8946	3.7914	<0.01	53.0781	2.2632	<0.01
	IIV(SD)	3.8289	1.3082	<0.01	5.7036	2.5516	0.027	-3.3695	1.5255	0.0289
	IIV(MID)	-0.3215	0.8405	0.70264	-2.4838	1.6399	0.132	1.2638	0.979	0.1989
	IIV(SE)	0.1837	0.2867	0.52283	0.2551	0.5592	0.649	-0.3775	0.3333	0.2594

## Sheet: SupplementaryData 4
			Group A (n = 23)		Group B (n = 44)		t-value	χ2-value	p-value
			Mean / n	SD / %	Mean / n	SD / %
	Demographic data
		Age	44	10.4316	38.7955	11.0781	1.8978	-	0.06384
		Male; n (%)	17	73.913	40	90.9091	-	2.228	0.1355
		BMI	23.2944	4.55013	22.6949	3.25986	0.56113	-	0.5784
		Full-time employee; n (%)	21	91.3043	44	100	-	1.5127	0.2187
		Outpatient; n (%)	8	34.7826	9	20.4546	-	0.96833	0.3251
	Occupation
		Managerial	4	17.3913	2	4.54545	-	8.1474	0.1483
		Technical	8	34.7826	18	40.9091
		Sales	9	39.1304	10	22.7273
		Service	0	0	1	2.27273
		Transportation	1	4.34783	10	22.7273
		Others	1	4.34783	3	6.81818
	BDI-Ⅱ (0~63)
		Score	10.6087	7.67368	9.18182	7.80957	0.71827	-	0.4763
		BDI-Ⅱ>13; n (%)	9	39.1304	8	18.1818	-	2.4817	0.1152
	STAI (20~80, respectively)
		State anxiety (STAI Y-1)	41	9.03025	40.4318	10.7884	0.22836	-	0.8203
		Trait anxiety (STAI Y-2)	47.3043	10.1015	43.5455	11.9815	1.3547	-	0.1814
	PANAS (8~48, respectively)
		Positive affect	26.087	6.74141	26.75	6.44881	-0.38794	-	0.7
		Negative affect	24.6957	6.88499	22.6364	8.65109	1.0617	-	0.2931

## Sheet: Supplementary Data 5
		Integrated analysis			Subgroup analysis
					Group A			Group B
		coefficient	S.E.	p-value	coefficient	S.E.	p-value	coefficient	S.E.	p-value
	Intercept (No feedback)	6h 46min	13min	2e-16	7h 11min	17min	2e-16	6h 36min	18min	2e-16
	Age	-2min	1min	0.00168	-3min	1min	0.00538	-3min	1min	0.02296
	Sex	36min	23min	0.12727	8min	22min	0.72616	1h 5min	46min	0.16366
	Sleep duration	-1min	3min	0.81627	-4min	5min	0.44864	0min	4min	0.97474
	Feedback (longer)	32min	22min	0.13003	7min	28min	0.79779	43min	30min	0.14994
	Feedback (shorter)	43min	19min	0.02215	-7min	25min	0.78515	1h 8min	26min	0.00959
	Day	3min	1min	0.07471	1min	2min	0.43291	3min	2min	0.20125
	Feedback (longer) × Day	0min	3min	0.90378	-2min	4min	0.6346	1min	4min	0.78128
	Feedback (shorter) × Day	-7min	3min	0.00601	-1min	3min	0.66365	-9min	3min	0.00751

## Sheet: Supplementary Data 6
	coefficient	EAP	SD	Lower limit of 95%CI	Upper limit of 95%CI	Rhat
	α(0)	7.17783	0.33035	6.52548	7.81206	1.00224
	α(1)	0.020976	0.0494023	-0.0748829	0.119394	0.999861
	α(2)Group-A	0.10225	0.430495	-0.735941	0.957367	1.00214
	α(2)Group-B	1.10237	0.315667	0.484666	1.72446	1.0003
	α(3)Group-A	-0.025523	0.0549907	-0.134651	0.0820298	1.00147
	α(3)Group-B	-0.106943	0.0426253	-0.191358	-0.0236472	1.00023
	α(4)	-0.528335	0.339082	-1.18923	0.124755	1.00122
	α(5)	0.0263205	0.0255341	-0.0244049	0.0761916	1.00125
	α(6)	-0.0457093	0.0134164	-0.07219	-0.0191018	1.00013
	α(7)	0.6888	0.430913	-0.140144	1.54255	1.0004
	τ(α)	0.928826	0.123148	0.710155	1.19201	1.00072
	σ(α)	1.47544	0.0538475	1.37515	1.58617	1.00012
	β(0)	48.6554	1.68888	45.3339	52.0602	1.00166
	β(1)	1.0215	0.510263	0.00438392	2.01788	1.00038
	β(2)	0.217016	0.145162	-0.063929	0.502333	1.00023
	β(3)	-2.41867	4.66319	-11.4204	6.87208	1.0027
	τ(β)	10.7552	1.34405	8.36196	13.6419	1.00114
	σ(β)	15.3567	0.555941	14.3075	16.4771	1.00014
	γ(0)	31.3588	3.42606	24.589	38.0463	1.00056
	γ(1)	-0.0854116	0.340149	-0.75325	0.585341	1.0001
	γ(2)	0.196435	0.288318	-0.367572	0.758715	1.00342
	γ(3)	3.29335	8.89818	-14.1869	20.4131	1.00339
	τ(γ)	25.1637	2.35213	21.1035	30.3353	1.0001
	σ(γ)	9.79303	0.352287	9.13534	10.5154	1.00024
	δ(0)	47.4836	1.71975	44.0889	50.8776	1.0008
	δ(1)	-0.518531	0.226972	-0.961058	-0.0732865	1.00022
	δ(2)	-0.154667	0.144096	-0.447902	0.123771	1.00287
	δ(3)	1.33996	4.47605	-7.41244	10.3158	1.00179
	τ(δ)	12.4201	1.19571	10.3001	14.9733	1.00026
	σ(δ)	6.6703	0.245038	6.21591	7.16456	1.00016
	Effect on sleep hours (Group-A, Day 1)	0.10225	0.430495	-0.735941	0.957367	1.00214
	Effect on sleep hours (Group-A, Day 2)	0.0767265	0.386636	-0.675445	0.840802	1.00211
	Effect on sleep hours (Group-A, Day 3)	0.0512035	0.345973	-0.620943	0.733376	1.00203
	Effect on sleep hours (Group-A, Day 4)	0.0256804	0.309766	-0.574416	0.634422	1.00188
	Effect on sleep hours (Group-A, Day 5)	0.000157387	0.279751	-0.54287	0.551527	1.0016
	Effect on sleep hours (Group-A, Day 6)	-0.0253656	0.258098	-0.526587	0.478383	1.0012
	Effect on sleep hours (Group-A, Day 7)	-0.0508887	0.247014	-0.531783	0.43632	1.00071
	Effect on sleep hours (Group-A, Day 8)	-0.0764117	0.247923	-0.560834	0.414056	1.00026
	Effect on sleep hours (Group-A, Day 9)	-0.101935	0.260698	-0.61368	0.413261	0.999954
	Effect on sleep hours (Group-A, Day 10)	-0.127458	0.283741	-0.686248	0.42855	0.999838
	Effect on sleep hours (Group-A, Day 11)	-0.152981	0.314805	-0.771173	0.459881	0.999857
	Effect on sleep hours (Group-A, Day 12)	-0.178504	0.351772	-0.868374	0.506407	0.999949
	Effect on sleep hours (Group-A, Day 13)	-0.204027	0.39298	-0.975756	0.560165	1.00007
	Effect on sleep hours (Group-A, Day 14)	-0.22955	0.43723	-1.09146	0.61859	1.00019
	Effect on sleep hours (Group-A, Day 15)	-0.255073	0.48369	-1.20894	0.685304	1.0003
	Effect on sleep hours (Group-B, Day 1)	1.10237	0.315667	0.484666	1.72446	1.0003
	Effect on sleep hours (Group-B, Day 2)	0.995423	0.282063	0.446188	1.549	1.00028
	Effect on sleep hours (Group-B, Day 3)	0.88848	0.251213	0.398319	1.38195	1.00026
	Effect on sleep hours (Group-B, Day 4)	0.781537	0.224254	0.343552	1.22212	1.00021
	Effect on sleep hours (Group-B, Day 5)	0.674593	0.202745	0.278941	1.0737	1.00014
	Effect on sleep hours (Group-B, Day 6)	0.56765	0.18856	0.202358	0.938941	1.00006
	Effect on sleep hours (Group-B, Day 7)	0.460707	0.183407	0.106341	0.821879	0.999972
	Effect on sleep hours (Group-B, Day 8)	0.353764	0.18803	-0.0102362	0.723422	0.999913
	Effect on sleep hours (Group-B, Day 9)	0.24682	0.201758	-0.146019	0.640683	0.999892
	Effect on sleep hours (Group-B, Day 10)	0.139877	0.222915	-0.296808	0.574	0.999903
	Effect on sleep hours (Group-B, Day 11)	0.032934	0.24962	-0.456604	0.520518	0.999929
	Effect on sleep hours (Group-B, Day 12)	-0.0740092	0.28029	-0.624475	0.476233	0.999959
	Effect on sleep hours (Group-B, Day 13)	-0.180952	0.313765	-0.797657	0.434284	0.999989
	Effect on sleep hours (Group-B, Day 14)	-0.287896	0.34924	-0.971718	0.395039	1.00002
	Effect on sleep hours (Group-B, Day 15)	-0.394839	0.386164	-1.15126	0.357556	1.00004
	Effect on depressive mood (Group-A, Day 1)	-0.0533256	0.245043	-0.586733	0.436802	1.002
	Effect on depressive mood (Group-A, Day 2)	-0.0399848	0.219712	-0.515048	0.405714	1.00194
	Effect on depressive mood (Group-A, Day 3)	-0.026644	0.196247	-0.449327	0.372484	1.00183
	Effect on depressive mood (Group-A, Day 4)	-0.0133032	0.175398	-0.387132	0.344181	1.00165
	Effect on depressive mood (Group-A, Day 5)	3.7662e-05	0.158203	-0.333724	0.326769	1.00136
	Effect on depressive mood (Group-A, Day 6)	0.0133785	0.145958	-0.284068	0.319879	1.00097
	Effect on depressive mood (Group-A, Day 7)	0.0267193	0.139969	-0.250173	0.327647	1.00054
	Effect on depressive mood (Group-A, Day 8)	0.0400601	0.141036	-0.235683	0.350965	1.00018
	Effect on depressive mood (Group-A, Day 9)	0.053401	0.149006	-0.230772	0.391011	0.999992
	Effect on depressive mood (Group-A, Day 10)	0.0667418	0.16287	-0.241645	0.434712	0.999971
	Effect on depressive mood (Group-A, Day 11)	0.0800826	0.18128	-0.260475	0.485837	1.00006
	Effect on depressive mood (Group-A, Day 12)	0.0934235	0.203003	-0.287778	0.549271	1.00019
	Effect on depressive mood (Group-A, Day 13)	0.106764	0.22709	-0.314802	0.615022	1.00032
	Effect on depressive mood (Group-A, Day 14)	0.120105	0.252867	-0.344647	0.684076	1.00045
	Effect on depressive mood (Group-A, Day 15)	0.133446	0.279867	-0.382046	0.759519	1.00057
	Effect on depressive mood (Group-B, Day 1)	-0.572487	0.309137	-1.25973	-0.0623609	1.00019
	Effect on depressive mood (Group-B, Day 2)	-0.516883	0.278086	-1.13357	-0.0576903	1.00016
	Effect on depressive mood (Group-B, Day 3)	-0.461279	0.24794	-1.0093	-0.0517857	1.00012
	Effect on depressive mood (Group-B, Day 4)	-0.405675	0.219071	-0.890698	-0.045626	1.00008
	Effect on depressive mood (Group-B, Day 5)	-0.350071	0.192057	-0.777128	-0.037335	1.00002
	Effect on depressive mood (Group-B, Day 6)	-0.294466	0.167796	-0.673181	-0.027092	0.999957
	Effect on depressive mood (Group-B, Day 7)	-0.238862	0.147652	-0.574172	-0.0108385	0.999887
	Effect on depressive mood (Group-B, Day 8)	-0.183258	0.133501	-0.489533	0.0144177	0.999838
	Effect on depressive mood (Group-B, Day 9)	-0.127654	0.127357	-0.419371	0.0772704	0.999847
	Effect on depressive mood (Group-B, Day 10)	-0.0720496	0.130357	-0.359709	0.166257	0.999928
	Effect on depressive mood (Group-B, Day 11)	-0.0164454	0.141922	-0.315993	0.273242	1.00004
	Effect on depressive mood (Group-B, Day 12)	0.0391589	0.160208	-0.275385	0.385162	1.00015
	Effect on depressive mood (Group-B, Day 13)	0.0947631	0.183214	-0.242697	0.507604	1.00023
	Effect on depressive mood (Group-B, Day 14)	0.150367	0.209389	-0.216949	0.632164	1.00028
	Effect on depressive mood (Group-B, Day 15)	0.205972	0.237689	-0.193623	0.757551	1.00031
	Effect on anxiety (Group-A, Day 1)	-0.00822513	0.154479	-0.353897	0.311254	1.00022
	Effect on anxiety (Group-A, Day 2)	-0.00600812	0.13779	-0.311072	0.282605	1.00021
	Effect on anxiety (Group-A, Day 3)	-0.00379111	0.122435	-0.274847	0.256736	1.00018
	Effect on anxiety (Group-A, Day 4)	-0.00157411	0.108979	-0.242926	0.234143	1.00014
	Effect on anxiety (Group-A, Day 5)	0.0006429	0.0982069	-0.215307	0.214516	1.00009
	Effect on anxiety (Group-A, Day 6)	0.00285991	0.091075	-0.191707	0.202533	1.00001
	Effect on anxiety (Group-A, Day 7)	0.00507692	0.0884684	-0.176209	0.204482	0.99994
	Effect on anxiety (Group-A, Day 8)	0.00729392	0.0907779	-0.174613	0.213333	0.99989
	Effect on anxiety (Group-A, Day 9)	0.00951093	0.0976553	-0.187632	0.233742	0.999875
	Effect on anxiety (Group-A, Day 10)	0.0117279	0.108233	-0.20465	0.264118	0.999886
	Effect on anxiety (Group-A, Day 11)	0.0139449	0.121549	-0.23145	0.298578	0.99991
	Effect on anxiety (Group-A, Day 12)	0.016162	0.136807	-0.263028	0.331766	0.999937
	Effect on anxiety (Group-A, Day 13)	0.018379	0.153427	-0.292668	0.373584	0.999963
	Effect on anxiety (Group-A, Day 14)	0.020596	0.171013	-0.32647	0.41987	0.999985
	Effect on anxiety (Group-A, Day 15)	0.022813	0.189296	-0.360276	0.4622	1
	Effect on anxiety (Group-B, Day 1)	-0.0937038	0.391598	-0.904216	0.683368	1.00002
	Effect on anxiety (Group-B, Day 2)	-0.0846495	0.353375	-0.816532	0.61179	1.00003
	Effect on anxiety (Group-B, Day 3)	-0.0755952	0.315418	-0.728235	0.549211	1.00004
	Effect on anxiety (Group-B, Day 4)	-0.0665409	0.277839	-0.641916	0.483135	1.00005
	Effect on anxiety (Group-B, Day 5)	-0.0574866	0.240812	-0.555985	0.419373	1.00006
	Effect on anxiety (Group-B, Day 6)	-0.0484322	0.204639	-0.476023	0.358215	1.00008
	Effect on anxiety (Group-B, Day 7)	-0.0393779	0.169864	-0.403833	0.295315	1.0001
	Effect on anxiety (Group-B, Day 8)	-0.0303236	0.137554	-0.336158	0.241851	1.00013
	Effect on anxiety (Group-B, Day 9)	-0.0212693	0.109904	-0.27493	0.199175	1.00015
	Effect on anxiety (Group-B, Day 10)	-0.012215	0.0912516	-0.22729	0.17015	1.00011
	Effect on anxiety (Group-B, Day 11)	-0.00316064	0.087552	-0.20026	0.181749	0.999994
	Effect on anxiety (Group-B, Day 12)	0.00589368	0.10047	-0.206106	0.231297	0.999882
	Effect on anxiety (Group-B, Day 13)	0.014948	0.124954	-0.23798	0.300948	0.999841
	Effect on anxiety (Group-B, Day 14)	0.0240023	0.155638	-0.292296	0.383512	0.999838
	Effect on anxiety (Group-B, Day 15)	0.0330566	0.189534	-0.35107	0.466167	0.999846
	Effect on sleep quality (Group-A, Day 1)	0.102288	0.497106	-0.88778	1.20646	1.00203
	Effect on sleep quality (Group-A, Day 2)	0.0762625	0.446079	-0.824875	1.0513	1.00201
	Effect on sleep quality (Group-A, Day 3)	0.0502375	0.398896	-0.772766	0.913749	1.00194
	Effect on sleep quality (Group-A, Day 4)	0.0242124	0.357084	-0.717936	0.78526	1.0018
	Effect on sleep quality (Group-A, Day 5)	-0.00181269	0.322737	-0.687189	0.670907	1.00155
	Effect on sleep quality (Group-A, Day 6)	-0.0278378	0.298443	-0.671705	0.584275	1.00117
	Effect on sleep quality (Group-A, Day 7)	-0.0538628	0.286771	-0.676257	0.52056	1.00071
	Effect on sleep quality (Group-A, Day 8)	-0.0798879	0.28925	-0.719628	0.481685	1.00029
	Effect on sleep quality (Group-A, Day 9)	-0.105913	0.305538	-0.795001	0.490125	1.00002
	Effect on sleep quality (Group-A, Day 10)	-0.131938	0.333617	-0.889604	0.511283	0.99991
	Effect on sleep quality (Group-A, Day 11)	-0.157963	0.370819	-1.0038	0.552811	0.999924
	Effect on sleep quality (Group-A, Day 12)	-0.183988	0.414696	-1.13288	0.590346	1
	Effect on sleep quality (Group-A, Day 13)	-0.210013	0.463355	-1.27197	0.648641	1.0001
	Effect on sleep quality (Group-A, Day 14)	-0.236038	0.515444	-1.41615	0.719808	1.00021
	Effect on sleep quality (Group-A, Day 15)	-0.262063	0.570023	-1.56368	0.786737	1.00031
	Effect on sleep quality (Group-B, Day 1)	1.12649	0.668818	0.00319096	2.59304	1.00039
	Effect on sleep quality (Group-B, Day 2)	1.01732	0.60216	0.00319171	2.34272	1.00042
	Effect on sleep quality (Group-B, Day 3)	0.908147	0.537176	0.00269598	2.08372	1.00045
	Effect on sleep quality (Group-B, Day 4)	0.798978	0.474554	0.00103508	1.84218	1.00049
	Effect on sleep quality (Group-B, Day 5)	0.689808	0.415363	-0.000641344	1.62456	1.00053
	Effect on sleep quality (Group-B, Day 6)	0.580639	0.361293	-0.00478831	1.40289	1.00057
	Effect on sleep quality (Group-B, Day 7)	0.47147	0.314993	-0.0172164	1.19195	1.00061
	Effect on sleep quality (Group-B, Day 8)	0.362301	0.28034	-0.0455672	1.02131	1.00061
	Effect on sleep quality (Group-B, Day 9)	0.253131	0.261996	-0.151501	0.870725	1.00053
	Effect on sleep quality (Group-B, Day 10)	0.143962	0.263392	-0.325501	0.752044	1.0004
	Effect on sleep quality (Group-B, Day 11)	0.0347928	0.284236	-0.538313	0.654929	1.00025
	Effect on sleep quality (Group-B, Day 12)	-0.0743764	0.32076	-0.773127	0.575736	1.00014
	Effect on sleep quality (Group-B, Day 13)	-0.183546	0.368327	-1.01601	0.497364	1.00008
	Effect on sleep quality (Group-B, Day 14)	-0.292715	0.423232	-1.27536	0.440133	1.00005
	Effect on sleep quality (Group-B, Day 15)	-0.401884	0.482977	-1.53413	0.391142	1.00004

## Sheet: Supplementary Data 7
	Intra-individual mean of sleep hour						The pairwise comparison test with Tukey correstion
		F-value	df factor	df residual	p-value		Contrast	estimate	S.E.	df	t.ratio	p-value
	Age	8.7369	1	63	0.004383		Study 1 - Study 2	0.192	0.0887	65	2.164	0.0341
	Sex	3.1754	1	63	0.079574
	Group	0.2723	1	63	0.603635
	Study	6.0661	1	65	0.016438
	Group × Study	0.3096	1	65	0.579853
	Intra-individual mean of midpoint of sleep						The pairwise comparison test with Tukey correstion
		F-value	df factor	df residual	p-value		Contrast	estimate	S.E.	df	t.ratio	p-value
	Age	1.4146	1	63	0.23875		Group-A - Group-B	-0.643	0.309	63	-2.081	0.0415
	Sex	0.0087	1	63	0.92611
	Group	4.3326	1	63	0.04146
	Study	0.214	1	65	0.64517
	Group × Study	0.0712	1	65	0.79043
	Intra-individual mean of sleep efficiency						The pairwise comparison test with Tukey correstion
		F-value	df factor	df residual	p-value		Contrast	estimate	S.E.	df	t.ratio	p-value
	Age	2.3313	1	63	0.131798		Group-A - Group-B	3.45	0.881	63	3.912	0.0002
	Sex	0.4435	1	63	0.50786
	Group	15.3073	1	63	0.0002266
	Study	0.5488	1	65	0.461462
	Group × Study	2.5153	1	65	0.117602
	Intra-individual variability of sleep hour						The pairwise comparison test with Tukey correstion
		F-value	df factor	df residual	p-value		Contrast	estimate	S.E.	df	t.ratio	p-value
	Age	9.8901	1	63	0.0025354		Group-A; Study 1 - Study 2	-0.158	0.1105	65	-1.428	0.1581
	Sex	0.0645	1	63	0.800325		Group-B; Study 1 - Study 2	0.275	0.0799	65	3.438	0.001
	Group	17.0215	1	63	0.0001104
	Study	3.8006	1	65	0.055552
	Group × Study	10.0576	1	65	0.0023159
	Intra-individual variability of midpoint of sleep						The pairwise comparison test with Tukey correstion
		F-value	df factor	df residual	p-value		Contrast	estimate	S.E.	df	t.ratio	p-value
	Age	9.5677	1	63	0.002951		Group-A - Group-B	-0.477	0.183	63	-2.614	0.0112
	Sex	1.2911	1	63	0.260143
	Group	6.8325	1	63	0.011183
	Study	0.0506	1	65	0.822743
	Group × Study	0.1999	1	65	0.656304
	Intra-individual variability of sleep efficiency						The pairwise comparison test with Tukey correstion
		F-value	df factor	df residual	p-value		Contrast	estimate	S.E.	df	t.ratio	p-value
	Age	0.0564	1	63	0.81303		Group-A; Study 1 - Study 2	-0.321	0.169	65	-1.902	0.0616
	Sex	1.0472	1	63	0.31008		Group-B; Study 1 - Study 2	0.225	0.122	65	1.84	0.0703
	Group	30.5279	1	63	6.689e-07
	Study	0.1418	1	65	0.70771
	Group × Study	6.8623	1	65	0.01095

## Sheet: Supplementary Data 8
	The PSQI total score						The pairwise comparison test with Tukey correstion
		F-value	df factor	df residual	p-value		Contrast	estimate	S.E.	df	t.ratio	p-value
	Age	0.5479	1	63	0.46193		Group-A; Before - After	-0.435	0.304	65	-1.428	0.158
	Sex	0.9729	1	63	0.32772		Group-B; Before - After	0.455	0.22	65	2.065	0.0429
	Group	1.8167	1	63	0.18253
	Time	0.7002	1	65	0.4058
	Group × Time	5.604	1	65	0.02091
	The PANAS positive score						The pairwise comparison test with Tukey correstion
		F-value	df factor	df residual	p-value		Contrast	estimate	S.E.	df	t.ratio	p-value
	Age	0.1374	1	63	0.71216		Before - After	0.843	0.557	65	1.514	0.1349
	Sex	0.0024	1	63	0.96103
	Group	0.1307	1	63	0.71888
	Time	4.6023	1	65	0.03567
	Group × Time	2.7887	1	65	0.09974
	The PANAS negative score						The pairwise comparison test with Tukey correstion
		F-value	df factor	df residual	p-value		Contrast	estimate	S.E.	df	t.ratio	p-value
	Age	0.206	1	63	0.651519		Before - After	0.939	0.527	65	1.781	0.0796
	Sex	7.8565	1	63	0.006722
	Group	0.4717	1	63	0.494729
	Time	4.1102	1	65	0.046729
	Group × Time	0.2126	1	65	0.646263
